# Supplementary material for: Unexpected effects of zirconium-doping in the high performance sodium manganese-based layer-tunnel cathode
Source: Royal Society of Chemistry journal article supplement (doi:10.1039/c8ta04818e), 2018-01-01
Supplement: c8ta04818e1.pdf [file c8ta04818e1.pdf]

Electronic Supplementary Information

## Unexpected effects of Zr-doping in the high performance sodium manganese-based layer-tunnel cathode

Jie Qu,<sup>a</sup> Tian sheng,<sup>b</sup> Zhen-guo Wu,<sup>\*a,c</sup> Ting-ru Chen,<sup>a</sup> Hui Chen,<sup>a</sup> Zu-guang Yang,<sup>a</sup>

Xiao-dong Guo,<sup>\*a,e</sup> Jun-tao Li,<sup>d</sup> Benhe Zhong,<sup>a</sup> Xue-shi Dou,<sup>e</sup>

<sup>a</sup>College of Chemical Engineering, Sichuan University, Chengdu 610065, P. R. China;

<sup>b</sup>College of Chemistry and Materials Science, Anhui Normal University, Wuhu, 241000, P. R. China;

<sup>c</sup>State Key Laboratory of Physical Chemistry of Solid Surfaces, College of Chemistry and Chemical Engineering, Xiamen University, Xiamen, 361005 (PR China);

<sup>d</sup>College of Energy, Xiamen University, Xiamen, 361005 (PR China);

<sup>e</sup>Institute for Superconducting and Electronic Materials, University of Wollongong, Wollongong, NSW 2522 (Australia);

**TableS1** Results of structural analysis obtained from X-ray Rietveld refinement of the prepared samples

|                        | Zr-0        |                | Zr-0.02     |                | Zr-0.05     |                |
|------------------------|-------------|----------------|-------------|----------------|-------------|----------------|
| space group            | <i>pbam</i> | <i>P63/mmc</i> | <i>pbam</i> | <i>P63/mmc</i> | <i>pbam</i> | <i>P63/mmc</i> |
| lattice parameters (Å) | a= 9.1682   | a=2.8689       | a=9.1737    | a=2.8832       | a=9.1706    | a=2.8713       |
|                        | b=26.6852   | b=2.8689       | b=26.7832   | b=2.8832       | c=26.6983   | b=2.8713       |
|                        | c=2.8265    | c=11.2386      | c=2.8348    | c=11.2596      | c=2.8234    | c=11.2403      |
| mass ratio (%)         | 34.6        | 66.4           | 30.4        | 69.6           | 28.2        | 71.8           |
| R <sub>wp</sub> (%)    |             | 6.61           |             | 5.96           |             | 6.94           |
| R <sub>p</sub> (%)     |             | 4.95           |             | 7.25           |             | 7.24           |

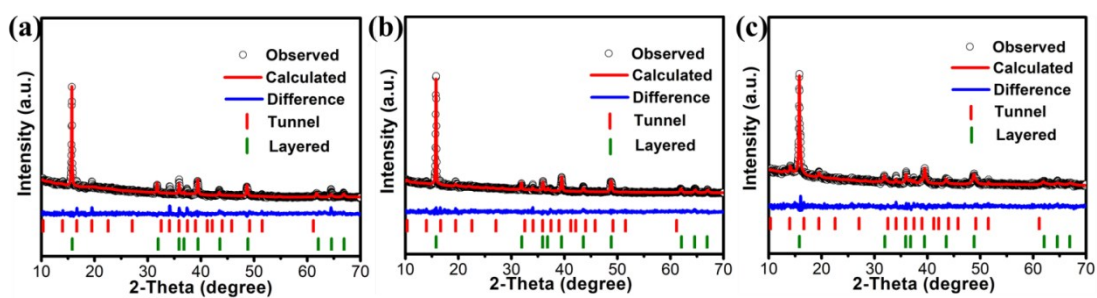

**Figure S1** Rietveld refinement of the as-synthesized (a)Zr-0, (b) Zr-0.02, (c) Zr-0.05.

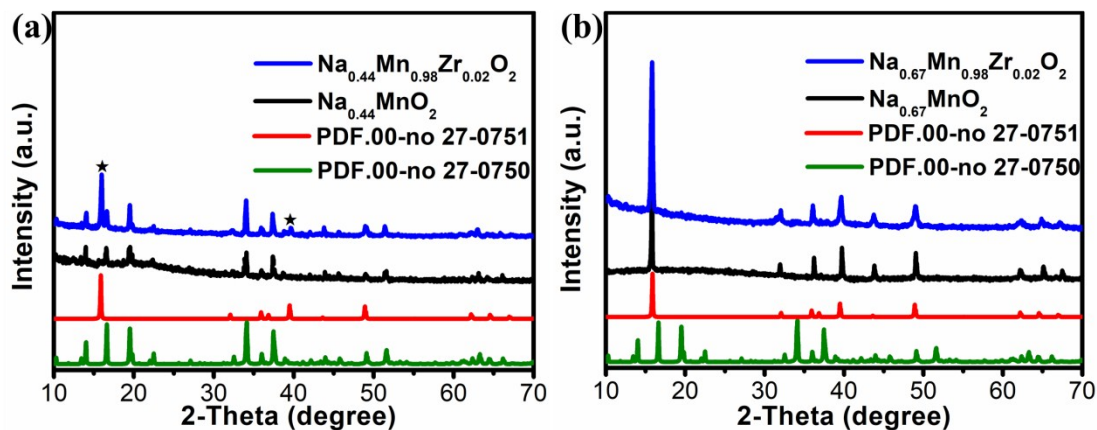

Figure S2. The XRD patterns of  $\text{Na}_{0.44}\text{MnO}_2$  (a) and  $\text{Na}_{0.44}\text{Mn}_{0.98}\text{Zr}_{0.02}\text{O}_2$  (b)

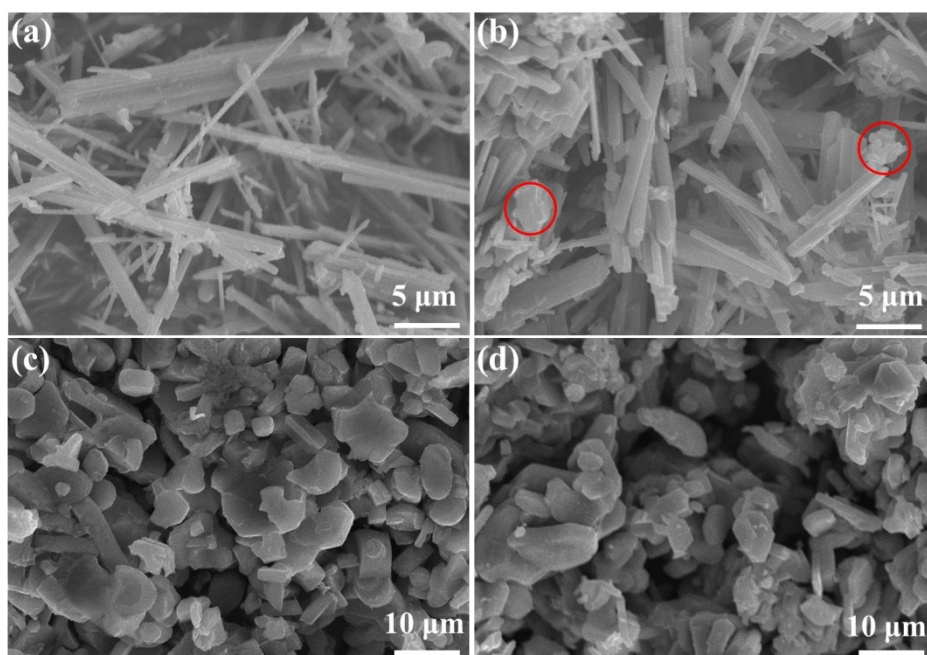

Figure S3. The sem images of  $\text{Na}_{0.44}\text{MnO}_2$  (a),  $\text{Na}_{0.44}\text{Mn}_{0.98}\text{Zr}_{0.02}\text{O}_2$  (b),  $\text{Na}_{0.67}\text{MnO}_2$  (c), and  $\text{Na}_{0.67}\text{Mn}_{0.98}\text{Zr}_{0.02}\text{O}_2$  (d).

### Computational methods

The spin-polarized electronic structure calculations were carried out using the Vienna Ab-initio Simulation Package (VASP) code with Perdew-Burke-Ernzerhof (PBE) functional of exchange-correlation.<sup>1-5</sup> The projector-augmented-wave (PAW) pseudopotentials were utilized to describe the core electron interaction. The on-site Coulomb repulsion correction term ( $U_{\text{eff}} = 4.0$  eV) determined by linear response theory was used in the 3d electrons of Mn.<sup>6,7</sup> The layered  $\text{Na}_{0.6}\text{MnO}_2$  model consists of 22 Na, 36 Mn and 72 O atoms, as shown in Figure a, corresponding to 36  $\text{MnO}_2$  formula unit (f. u.). For the layered structure, the one and two Zr atom doped structures equal to the stoichiometric  $\text{Na}_{0.611}\text{Mn}_{0.972}\text{Zr}_{0.028}\text{O}_2$  and  $\text{Na}_{0.611}\text{Mn}_{0.944}\text{Zr}_{0.056}\text{O}_2$ , respectively. The tunnel  $\text{Na}_{0.6}\text{MnO}_2$  model consists of 32 Na, 54 Mn and 108 O atoms, corresponding to 54  $\text{MnO}_2$  formula unit (f. u.). For the tunnel structure, the one and two Zr atom doped structures equal to the stoichiometric  $\text{Na}_{0.593}\text{Mn}_{0.981}\text{Zr}_{0.019}\text{O}_2$  and  $\text{Na}_{0.593}\text{Mn}_{0.963}\text{Zr}_{0.037}\text{O}_2$ , respectively. The cut-off energy was 500 eV and the Monkhorst-Pack k-point sampling was  $2 \times 2 \times 1$  for both layered and tunnel  $\text{Na}_{0.66}\text{MnO}_2$ . For the Zr doped tunnel  $\text{Na}_{0.6}\text{MnO}_2$ , the most stable position for Zr atom are examined at all five different Mn positions, and the most

stable position were presented as presented in **Figure S4b**.

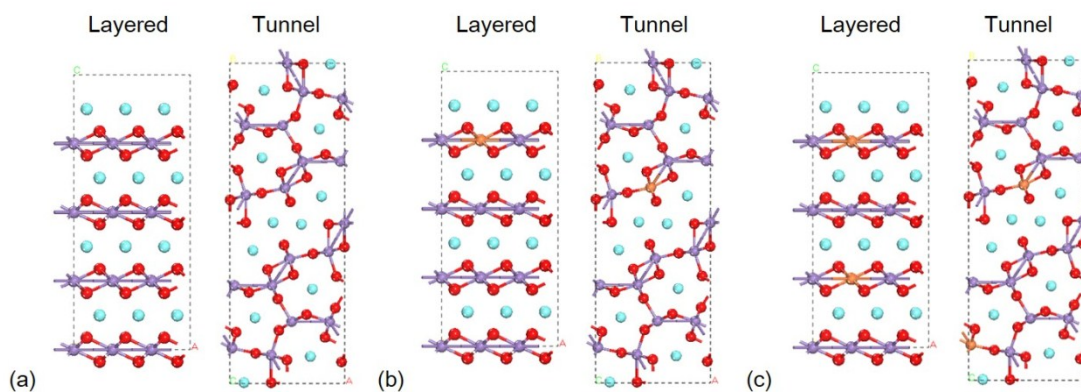

**Figure S4.** Theoretical models of (a) pristine, (b) one Zr atom doped, (c) two Zr atoms doped, layered and tunnel NaMnO<sub>2</sub> structures. Purple: Mn; red: O; light green: Na; orange: Zr.

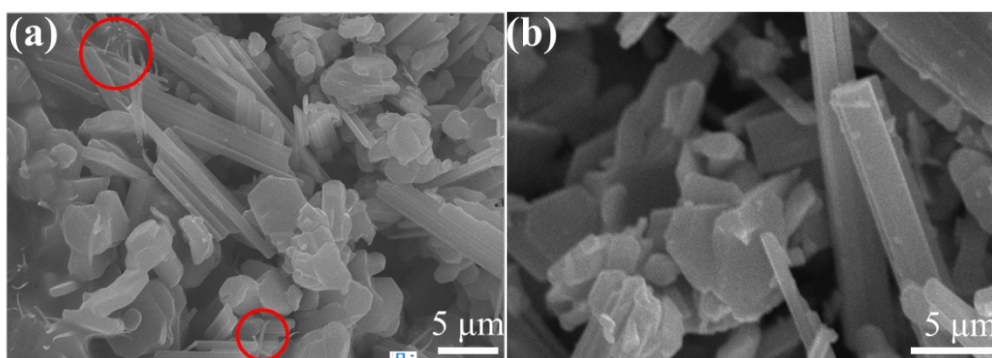

**Figure S5.** The sem images of Zr-0 (a) and Zr-0-rinsed (b)

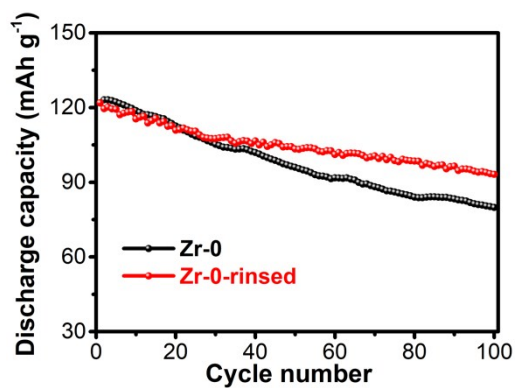

**Figure S6.** The cycling performances of Zr-0 and Zr-0-rinsed at 1 C.

**Table S2** ICP-AES results of Na<sub>0.6</sub>Mn<sub>1-x</sub>Zr<sub>x</sub>O<sub>2</sub> (x=0,0.02,0.05)

| samples | Measured atomic ratio |       |       |
|---------|-----------------------|-------|-------|
|         | Na                    | Mn    | Zr    |
| x=0     | 0.598                 | 0.996 | 0     |
| x=0.02  | 0.602                 | 0.975 | 0.018 |
| x=0.05  | 0.605                 | 0.951 | 0.052 |

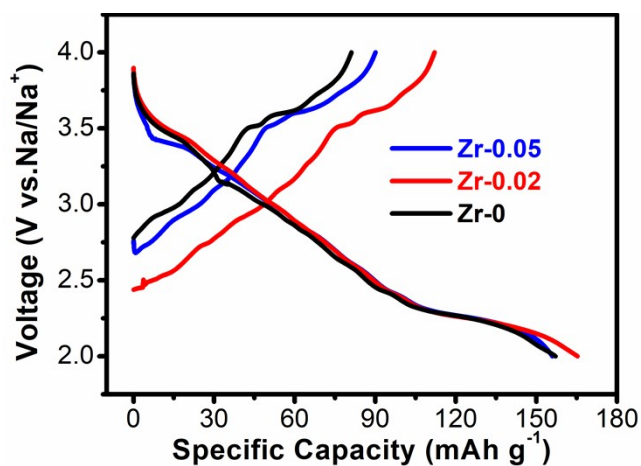

Figure S7. The first charge-discharge curves of Zr-0, Zr-0.02 and Zr-0.05 at 0.2 C

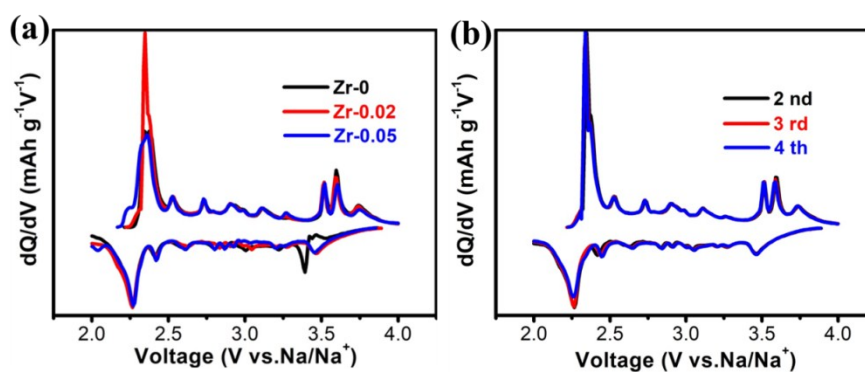

Figure S8. (a) The second dq/dv plots of Zr-0, Zr-0.02, Zr-0.05 between 2.0 and 4.0 V at 0.2 C. (b) dq/dv plots of at 0.2 C of Zr-0.02 in the initial cycles.

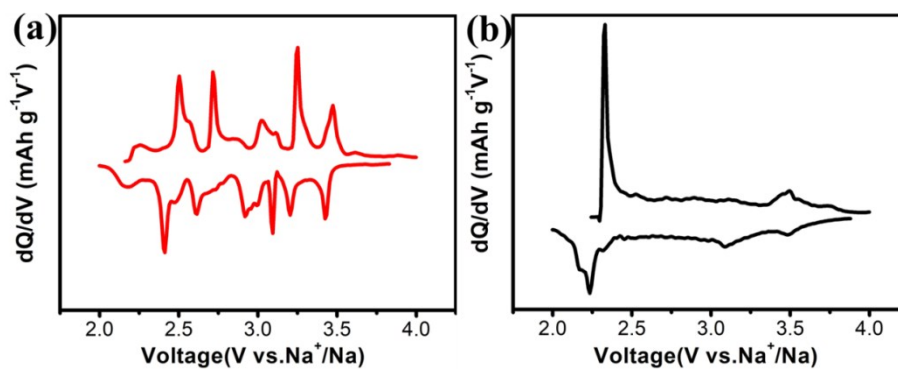

Figure S9. The dq/dv curves of  $\text{Na}_{0.44}\text{MnO}_2$  (a) and  $\text{Na}_{0.67}\text{MnO}_2$  (b) at 0.2 C in the second cycle.

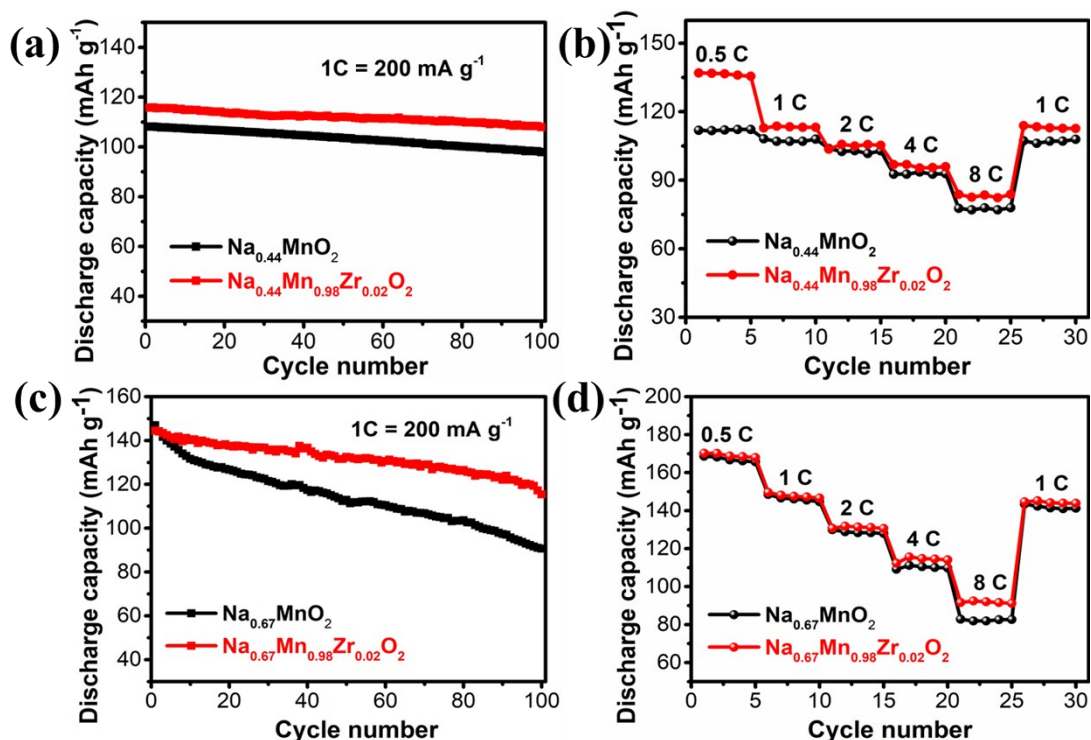

**Figure S10.** The electrochemical performances comparisons between  $\text{Na}_{0.44}\text{MnO}_2$  and  $\text{Na}_{0.44}\text{Mn}_{0.98}\text{Zr}_{0.02}\text{O}_2$  (a-b),  $\text{Na}_{0.67}\text{MnO}_2$  and  $\text{Na}_{0.67}\text{Mn}_{0.98}\text{Zr}_{0.02}\text{O}_2$  (c-d).

**Table S3.** The comparisons on  $\text{Na}^+$  storage performances between some literatures about layered metal oxides-based cathodes and Zr-0.02

| cathode materials                                                                  | rate capability                                     | cycling stability                                 | Reference |
|------------------------------------------------------------------------------------|-----------------------------------------------------|---------------------------------------------------|-----------|
| $\text{P2-Na}_{0.7}\text{CoO}_2$                                                   | 64 $\text{mAh g}^{-1}$ at 2000 $\text{mA g}^{-1}$   | 86% after 300 cycles at 50 $\text{mA g}^{-1}$     | 4         |
| $\text{P2/O3-Na}_{0.66}\text{Li}_{0.18}\text{Mn}_{0.71}\text{Co}_{0.08}\text{O}_2$ | 69 $\text{mAh g}^{-1}$ at 500 $\text{mA g}^{-1}$    | 75% after 150 cycles at 50 $\text{mA g}^{-1}$     | 5         |
| $\text{P2-Na}_{0.66}\text{Ni}_{0.26}\text{Mn}_{0.67}\text{Zn}_{0.07}\text{O}_2$    | 79 $\text{mAh g}^{-1}$ at 768 $\text{mA g}^{-1}$    | 83% after 30 cycles at 12 $\text{mA g}^{-1}$      | 6         |
| $\text{P2/O3-Na}_{0.67}\text{Li}_{0.18}\text{Mn}_{0.8}\text{Cu}_{0.2}\text{O}_2$   | 30 $\text{mAh g}^{-1}$ at 1205 $\text{mA g}^{-1}$   | 65.5% after 100 cycles at 241 $\text{mA g}^{-1}$  | 7         |
| $\text{P2-Na}_{0.67}\text{Cu}_{0.14}\text{Mn}_{0.86}\text{O}_2$                    | 89.6 $\text{mAh g}^{-1}$ at 1000 $\text{mA g}^{-1}$ | 63.3% after 500 cycles at 1000 $\text{mA g}^{-1}$ | 8         |
| $\text{P2-Na}_{0.67}\text{Mn}_{0.8}\text{Fe}_{0.1}\text{Ti}_{0.1}\text{O}_2$       | 45 $\text{mAh g}^{-1}$ at 2450 $\text{mA g}^{-1}$   | 70% after 300 cycles at 245 $\text{mA g}^{-1}$    | 9         |
| $\text{P2/T-Na}_{0.6}\text{Mn}_{0.98}\text{Zr}_{0.02}\text{O}_2$                   | 81 $\text{mAh g}^{-1}$ at 2000 $\text{mA g}^{-1}$   | 75% after 1000 cycles at 2000 $\text{mA g}^{-1}$  | this work |

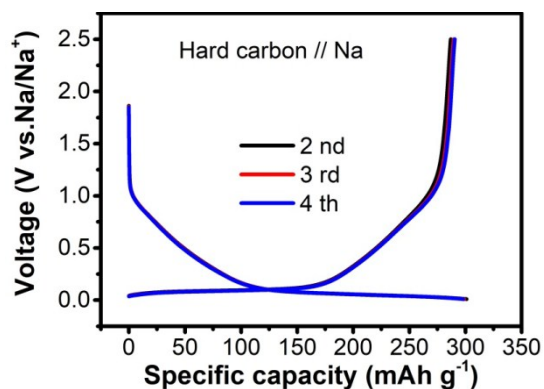

**Figure S11.** The initial charge-discharge profiles of hard carbon anode between 0.01 and 2.5 V (vs Na/Na<sup>+</sup>)

**Table S4.** The fitting results of equivalent circuit from EIS curves at room temperatures

| Samples | $R_{ct}/\Omega$ | $D_{Na^+}/(cm^2 s^{-1})$ | chi <sup>2</sup> (%) | Errors (%) |
|---------|-----------------|--------------------------|----------------------|------------|
| Zr-0    | 178.3           | $5.42 \times 10^{-14}$   | 0.2865               | 1.6874     |
| Zr-0.02 | 89.4            | $8.62 \times 10^{-14}$   | 0.2962               | 2.3555     |
| Zr-0.05 | 146.65          | $4.18 \times 10^{-14}$ , | 0.1985               | 1.4856     |

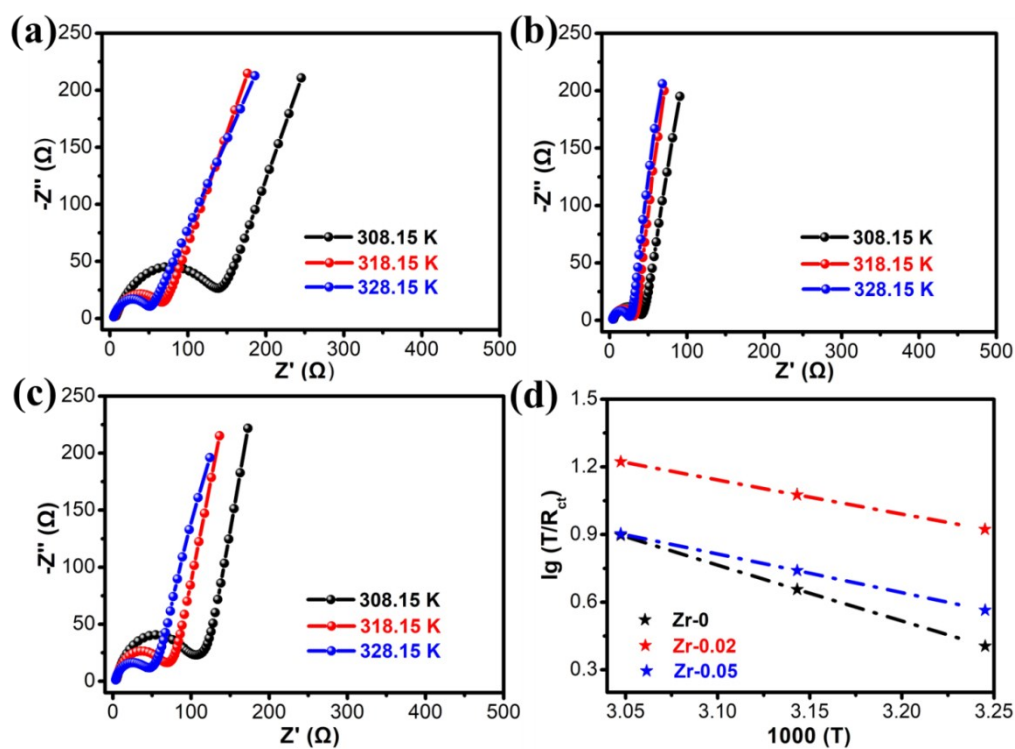

**Figure S12.** The Nyquist plots of Zr-0 (a), Zr-0.02 (b), Zr-0.05 (c) at different temperature after cycling at a current density of 200 mA g<sup>-1</sup> for 100 circles. The plots of  $\ln(T/R_{ct})$  as a function of  $1000/T$  for Zr-0, Zr-0.02 and Zr-0.05 (d).

**Equation S1:**  $\frac{T}{R_{ct}} = A \exp\left(-\frac{E_a}{RT}\right)$

where  $E_a$  is the activation energy,  $T$  the absolute temperature,  $R$  the gas constant,  $R_{ct}$  is the interfacial sodium-ion transfer resistance, and  $A$  the pre-exponential factor.

**Table S5** Fitting results of equivalent circuit from Nyquist curves for the samples

| Sample  | Temperature (K) | $R_s$ ( $\Omega$ ) | $R_{ct}$ ( $\Omega$ ) |
|---------|-----------------|--------------------|-----------------------|
| Zr-0    | 308.15          | 6.673              | 149.8                 |
|         | 318.15          | 4.73               | 76.26                 |
|         | 328.15          | 4.178              | 56.36                 |
| Zr-0.02 | 308.15          | 4.447              | 39.18                 |
|         | 318.15          | 3.806              | 28.2                  |
|         | 328.15          | 3.522              | 23.02                 |
| Zr-0.05 | 308.15          | 4.178              | 108.3                 |
|         | 318.15          | 3.617              | 70.66                 |
|         | 328.15          | 3.015              | 47.34                 |

**Equation S2:**  $E_a = -Rk \ln 10$

It is clear that  $E_a$  is in proportion to  $k$ . The values of  $E_a$  were calculated to be 47.57, 28.98, 32.82 kJ mol<sup>-1</sup> in Zr-0, Zr-0.02, Zr-0.05.

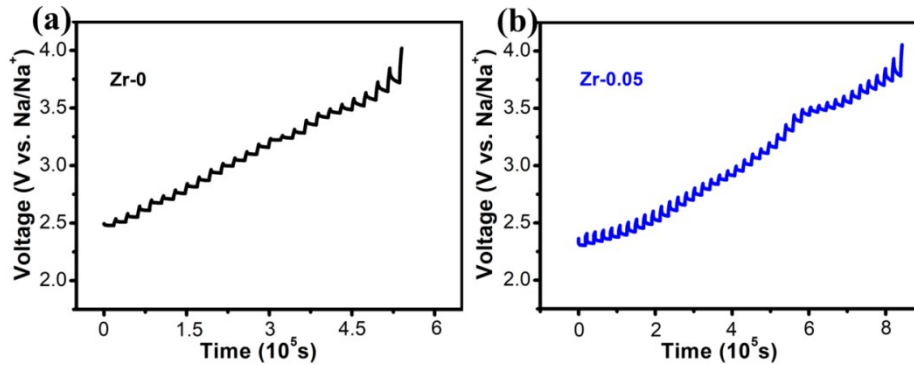

**Figure S13.** GITT curves of Zr-0 (a) and Zr-0.05 (b) for the first charge process between 2.0 V and 4.0 V

**Table S6** The calculated average  $\bar{D}$  values from the GITT tests for the Zr-0, Zr-0.02 and Zr-0.05

| Sample  | $\bar{D}/\text{cm}^2 \text{ s}^{-1}$ |
|---------|--------------------------------------|
| Zr-0    | $1.53 \times 10^{-14}$               |
| Zr-0.02 | $2.72 \times 10^{-14}$               |
| Zr-0.05 | $1.66 \times 10^{-14}$ ,             |

## References

1. G. Kresse, J. Hafner, *Physical. Review. B* 1993, **48**, 13115-13118.
2. G. Kresse, J. Furthmuler, *Physical. Review. B* 1996, **54**, 11169-11186.
3. P. E. Blochl, *Physical. Review. B* 1994, **50**, 17953-17979.
4. G. Kresse, D. Joubert, *Physical. Review. B* 1999, **59**, 1758-1775.
5. J. P. Pedrew, K. Burke, M. Ernzerhof, *Physical. Review. Letters.* 1996, **77**, 3865-3868.
6. M. Cococcioni, S. de Gironcoli, *Physical. Review. B* 2005, **71**, 035105.
7. C. Franchini, R. Podloucky, J. Paier, M. Marsman, G. Kresse, *Physical. Review. B* 2007, **75**, 195128.
8. Y. J Fang, X. Y Yu, X. W. Lou, *Angewandte Chemie International Edition*, 2017, **56**, 5801.
9. S. Guo, P. Liu, H. Yu, Y. Zhu, M. Chen, M. Ishida and H. Zhou, *Angewandte Chemie*, 2015, **54**, 5894-5899.
10. X. Wu, J. Guo, D. Wang, G. Zhong, M. J. McDonald and Y. Yang, *Journal of Power Sources*, 2015, **281**, 18-26.
11. M. Bianchini, E. Gonzalo, N. E. Drewett, N. Ortiz-Vitoriano, J. M. López del Amo, F. J. Bonilla, B. Acebedo and T. Rojo, *Journal of Materials Chemistry A*, 2018, **6**, 3552-3559.
12. W. Kang, Z. Zhang, P.-K. Lee, T.-W. Ng, W. Li, Y. Tang, W. Zhang, C.-S. Lee and D. Y. Wai Yu, *Journal of Materials Chemistry A*, 2015, **3**, 22846-22852.
13. M. H. Han, E. Gonzalo, N. Sharma, J. M. López del Amo, M. Armand, M. Avdeev, J. J. Saiz Garitaonandia and T. Rojo, *Chemistry of Materials*, 2015, **28**, 106-116.
